# Supplementary material for: Protein–surface interactions in nano-scale biosensors for IL-6 detection using functional monolayers
Source: Royal Society of Chemistry journal article supplement (doi:10.1039/d4nr04199b), 2025-01-01
Supplement: d4nr04199b7.pdf [file d4nr04199b7.pdf]

## Supplementary Information

# Protein-Surface Interactions in Nano-Scale Biosensors for IL-6 Detection Using Functional Monolayers

*Serena Giberti<sup>1</sup>, Sutapa Dutta<sup>1</sup>, Stefano Corni<sup>2</sup>, Marco Frasconi<sup>2\*</sup>, Giorgia Brancolini<sup>1\*</sup>*

<sup>1</sup> Institute Nanoscience – CNR-NANO, Center S3, via G. Campi 213/A, 41125, Modena, Italy

<sup>2</sup> Department of Chemistry, University of Padova, via Marzolo 1, 35131 Padova, Italy

\*: corresponding author: [marco.frasconi@unipd.it](mailto:marco.frasconi@unipd.it); [giorgia.brancolini@nano.cnr.it](mailto:giorgia.brancolini@nano.cnr.it)

### Table of Contents

|                                                                                 |   |
|---------------------------------------------------------------------------------|---|
| <b>Fig. S1</b> RMSD and SASA of M-SAM and S-SAM.....                            | 2 |
| <b>Fig. S2</b> Density of Cl <sup>-</sup> ions on M-SAM and S-SAM surfaces..... | 2 |
| <b>Fig. S3</b> RMSD, Radius of gyration and RMSF of Proteins.....               | 3 |
| <b>Fig. S4</b> Clustering on Protein results.....                               | 3 |
| <b>Fig. S5</b> MD Adsorption Energies MD.....                                   | 4 |
| <b>Fig. S6</b> Protein Models.....                                              | 4 |

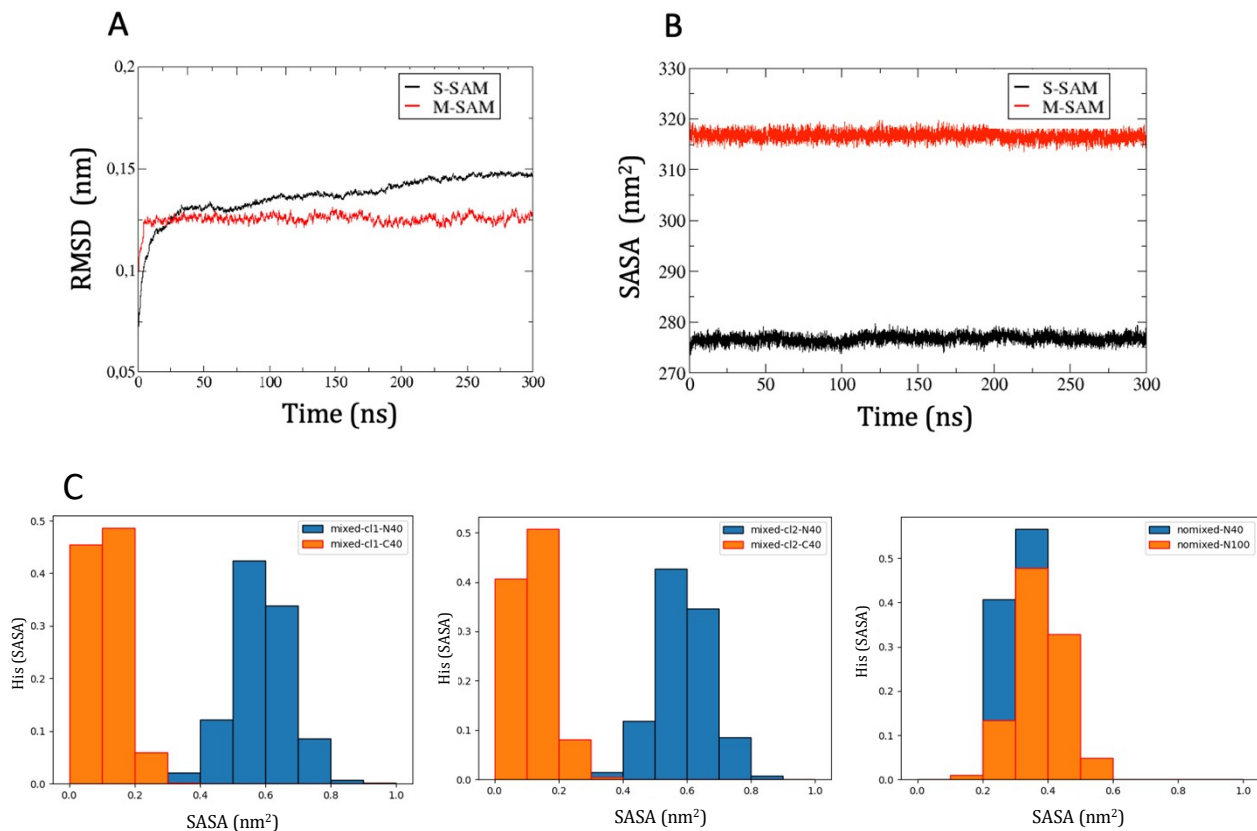

**Figure S1.** RMSD (panel A) and SASA (panel B) of the 300 ns trajectories collected for M-SAM and S-SAM, using as the reference the first frame. Panel C, SASA computed for individual  $\text{NH}_3^+$  spacers is increased in M-SAM compared to S-SAM. SASA of each N4 (namely N of  $\text{NH}_3^+$  group) are qualitatively classified in three regimes:  $\text{SASA} < 0.4 \text{ nm}^2$ ,  $0.4 < \text{SASA} < 0.5$ ,  $\text{SASA} > 0.5$ . Since the overall SASA of amino groups in the second and third groups is larger for the mixed-SAM compared to the S-SAM, fully functionalized high-density surfaces are expected to reach saturation earlier than their half-functionalized counterparts.

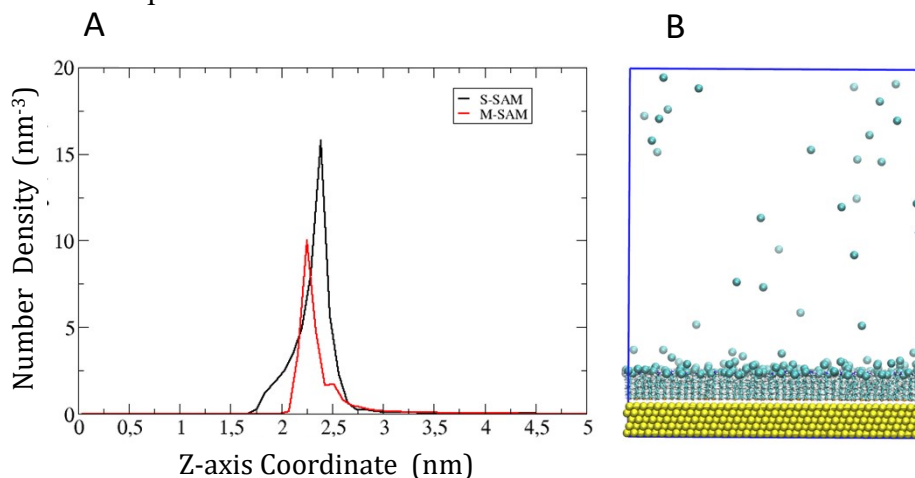

**Figure S2.** Illustration of the density of  $\text{Cl}^-$  ions condensed near the SAM surfaces. Panel A shows the calculation of the number density of particles by dividing the box into slices and calculating the temporal average over time. Panel B shows a snapshot of the surface with the total number of  $\text{Cl}^-$  counterions. A layer of 217  $\text{Cl}^-$  ions formed near the ligands of the M-SAM, and 432 formed near the S-SAM.

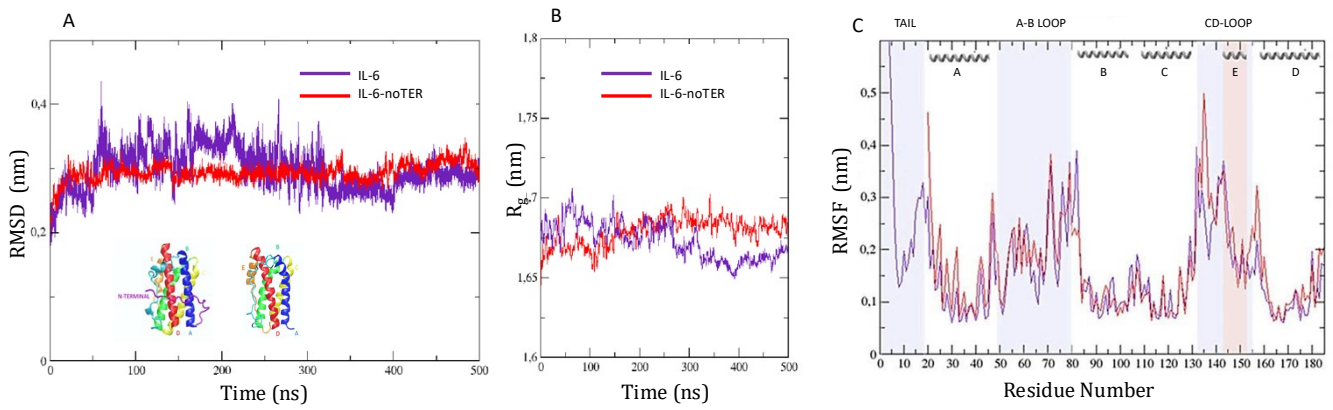

**Figure S3.** RMSD, Radius of gyration and RMSF of IL-6 and IL-6-noTER.

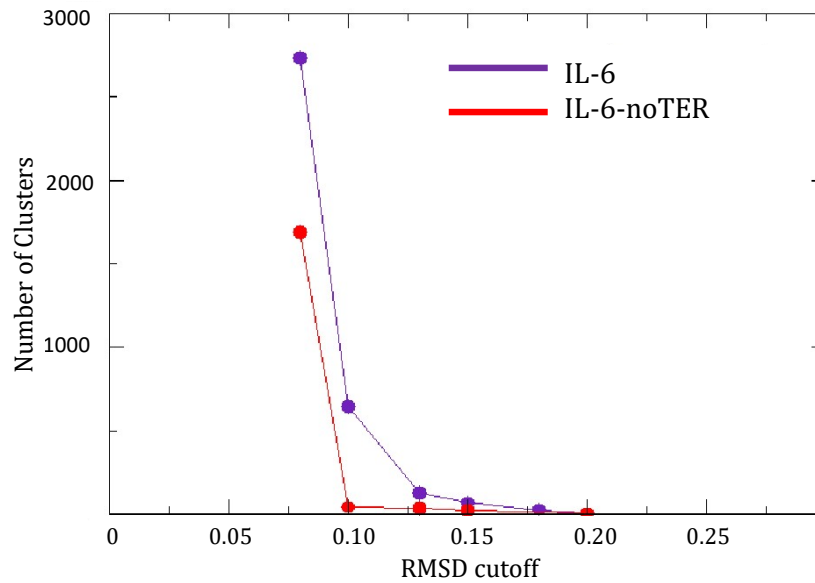

**Figure S4.** Curve obtained during clustering procedure over protein's trajectories. The cut off= 0.13 nm was chosen for IL-6-noTER and cut off = 0.18 nm was chosen for IL-6.

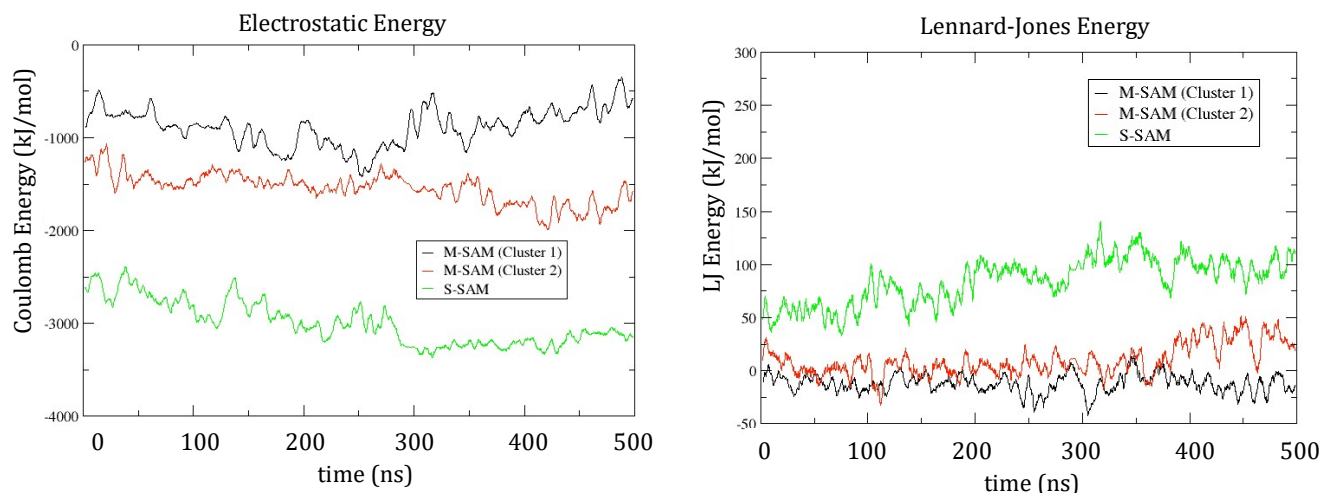

**Figure S5.** Computed Adsorption Energies along 500 ns trajectories: Coulomb (left panel) and Lennard Jones (right panel) contributions for M-SAM and S-SAM

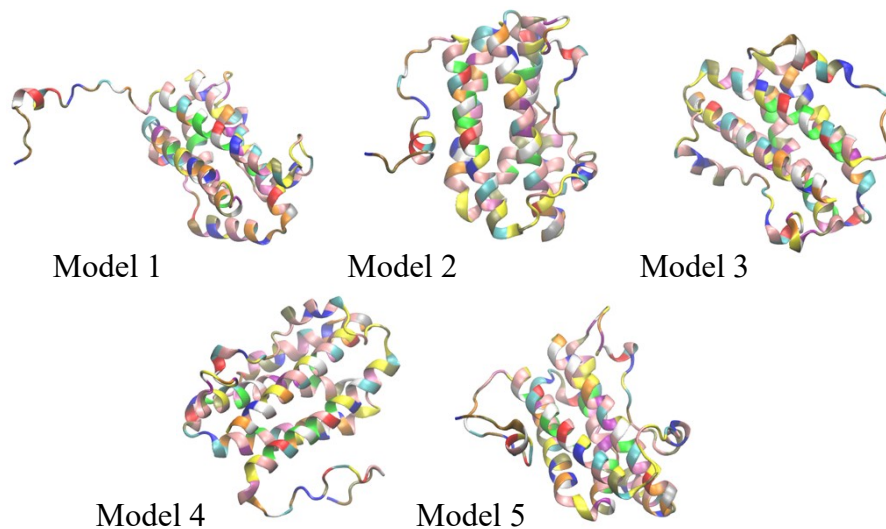

| IL-6 model predicted with AI | RM SD (nm) |
|------------------------------|------------|
| Model 2                      | 0.6612     |
| Model 3                      | 0.5811     |
| Model 4                      | 0.7490     |
| Model 5                      | 0.6996     |

**Figure S6.** Top. IL-6 models predicted with AI from the primary sequence. Bottom. RMSD with respect to Protein backbone. Model 3 has been used in simulation.
