# Supplementary figures and images for: Protein–surface interactions in nano-scale biosensors for IL-6 detection using functional monolayers
Source: Royal Society of Chemistry journal article supplement (doi:10.1039/d4nr04199b), 2025-01-01

**B**

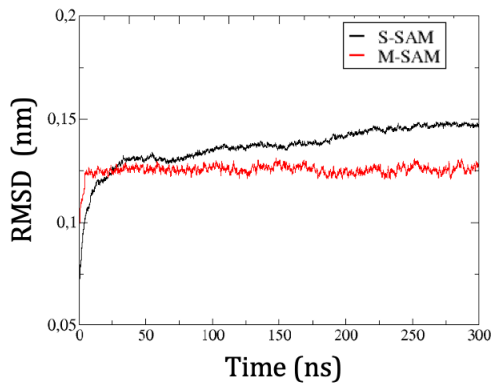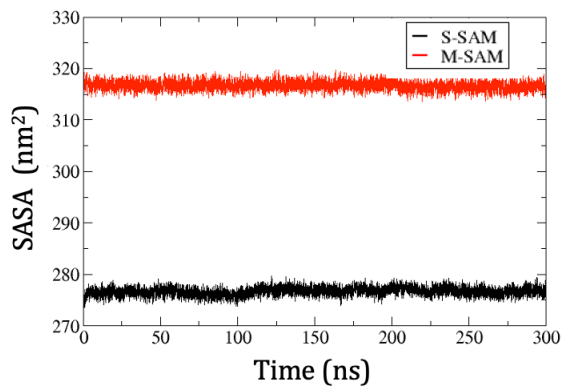

**C**

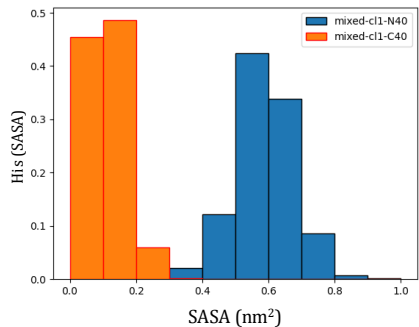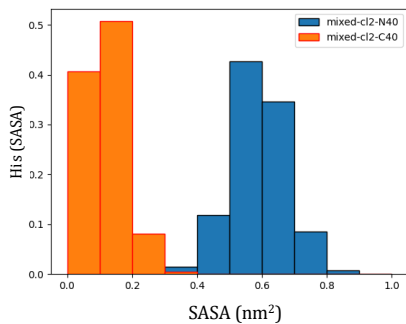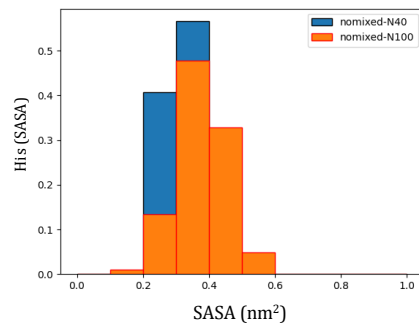

Supplement: d4nr04199b2.pdf [file d4nr04199b2.pdf]

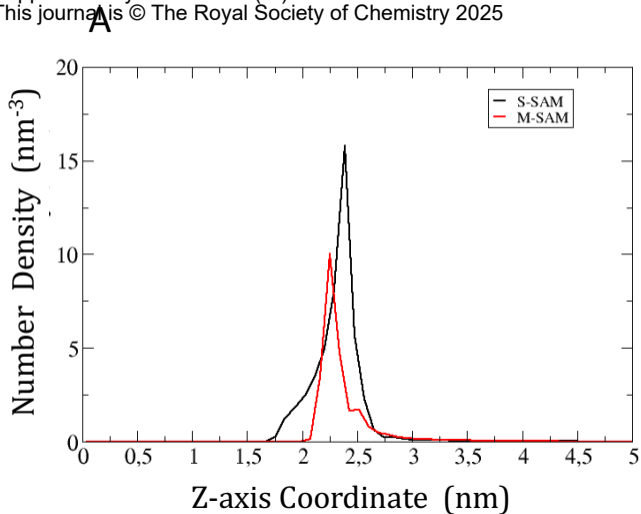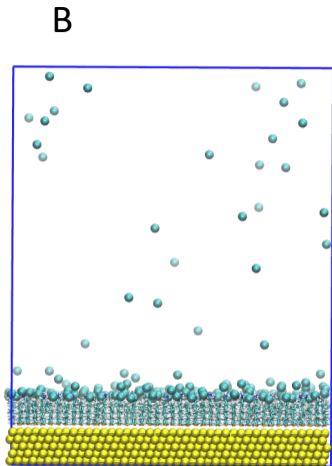

Supplement: d4nr04199b3.pdf [file d4nr04199b3.pdf]

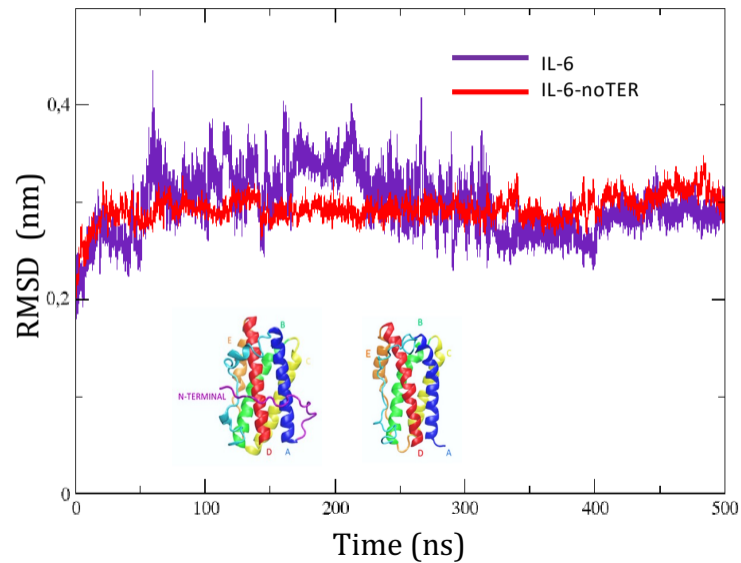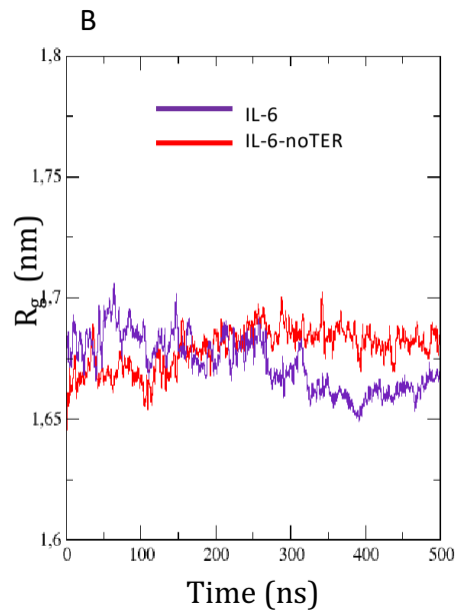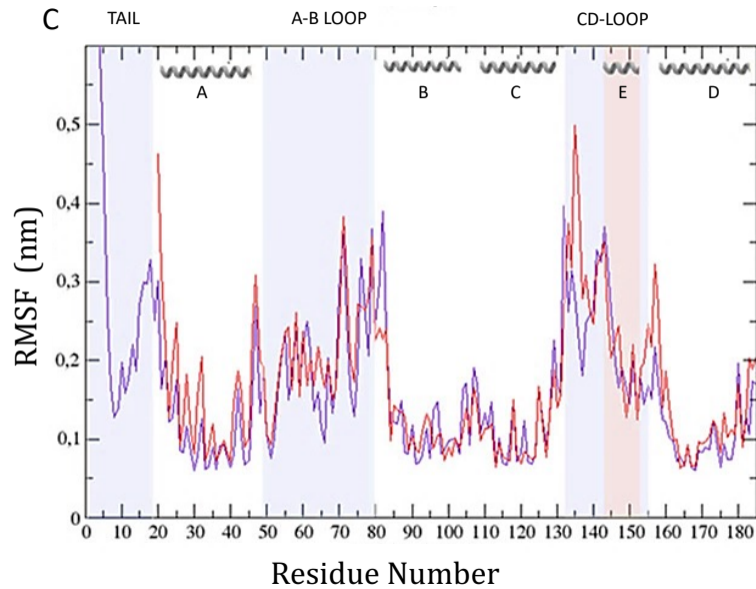

Supplement: d4nr04199b4.pdf [file d4nr04199b4.pdf]

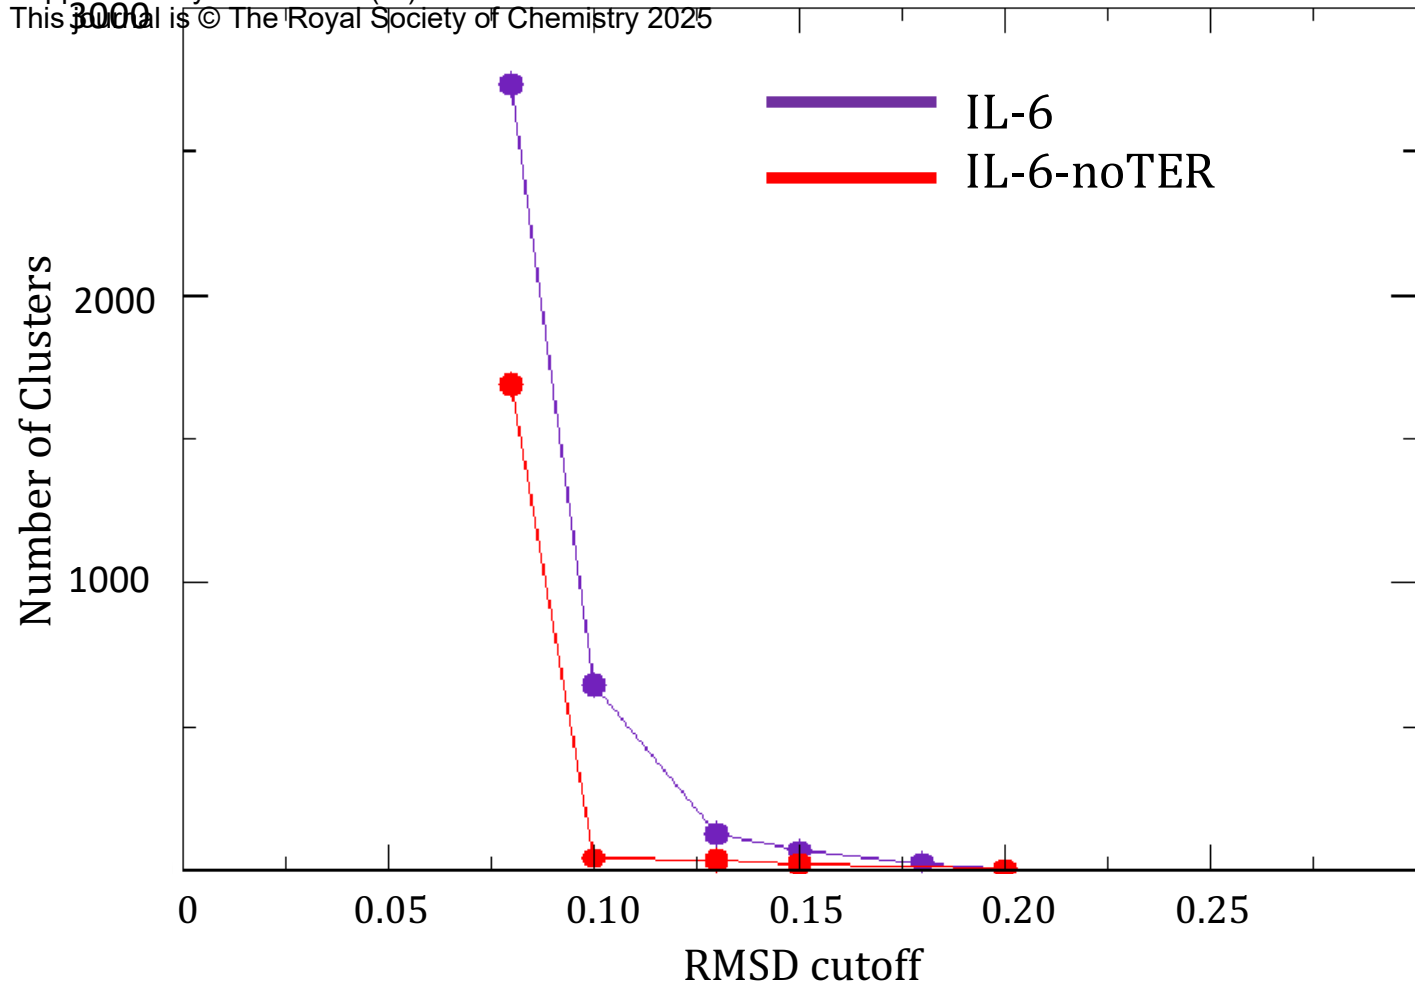

Supplement: d4nr04199b5.pdf [file d4nr04199b5.pdf]

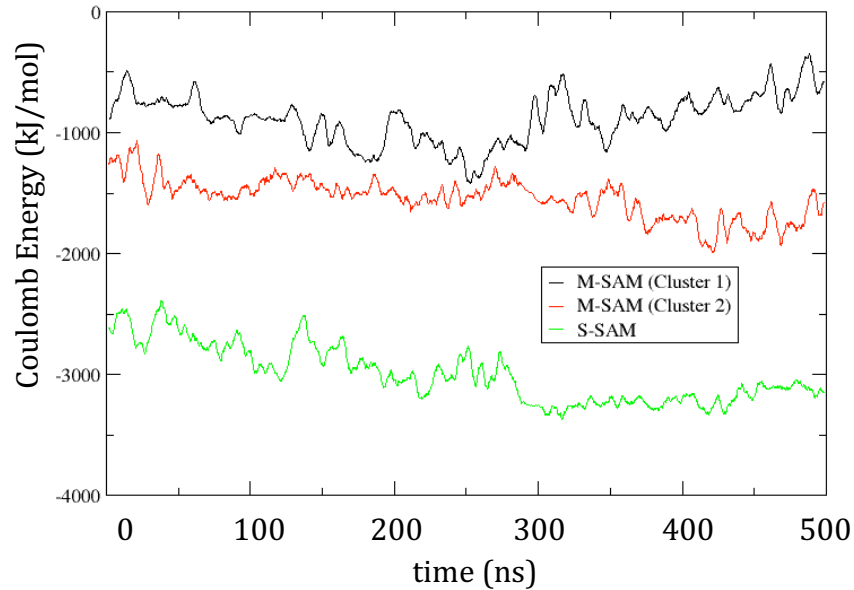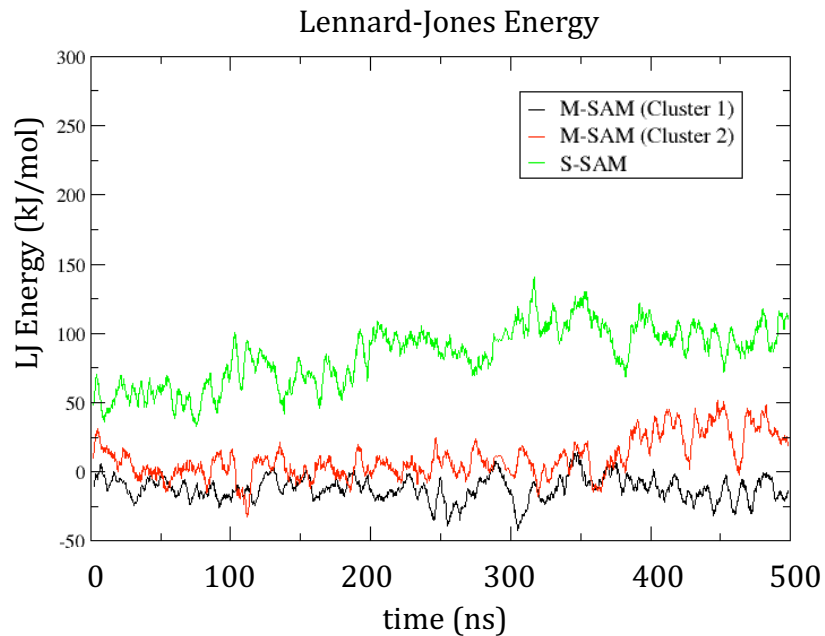

Supplement: d4nr04199b6.pdf [file d4nr04199b6.pdf]
